# Supplementary material for: Adherence to Anti-Diabetic Medication, Its Associated Factors, Barriers, Facilitators and Strategies for Improvements among Adults with Type 2 Diabetes Mellitus Attending Regional Referral Facility in Eastern Uganda: a Mixed Study Design
Source: Research Square preprint supplement (doi:10.21203/rs.3.rs-8097219/v1), 2025-12-10
Supplement: Supplementary file 1 [file 328017ee452ce3d4ca93b29a.docx]

# **Supplementary 1: Questionnaire**

**QUESTIONNAIRE (ENGLISH): SERIAL NO:……….**

Research Topic: **Adherence to Anti-Diabetic Medication, Its Associated Factors, Barriers, Facilitators and Strategies for Improvements among Adults with Type 2 Diabetes Mellitus Attending Regional Referral Facility in Eastern Uganda: a Mixed Study Design**

**Instructions**

Tick in the correct boxes the client responses. Do not add any other information apart from that the participant gives you.

**Section A: Demographic characteristic of the participant.**

1. What is your sex? Male [ ] Female [ ]
2. How old are you? ………………(in years)
3. What is your religion?

Born- again [ ] catholic [ ] protestant [ ] Muslim [ ] others……………

1. What is the highest level of your education?

Not educated (Informal education or primary) [ ] Educated (secondary or Tertiary) [ ]

1. Where do you stay? In town/urban [ ] in the village/ rural [ ]
2. What is your employment status? Employed (formal/ informal) [ ] Not employed [ ]
3. What is your family income?

Low (<111000/=) [ ] Medium (111000-500000/=) High (> 500000/=)

1. What is your marital status

Single [ ] married [ ] widowed [ ] divorced/ separated [ ]

**Section B: Client related factors**

1. How long have you lived with type 2 diabetes mellitus since the time of diagnosis?...............(in years)
2. Do you take alcohol do you take? No [ ] Yes [ ]
3. Do you have any other comorbidity? Yes [ ] No [ ]
4. Do you smoke? No [ ] Yes [ ]
5. Do you have people who support you in managing your condition?

Yes [ ] No [ ]

1. Have you been admitted because of any complications of diabetes mellitus?

No [ ] Yes [ ]

1. Do you think the medications given to you are helpful in managing your condition?

No [ ] Yes [ ]

**Section C: Treatment related factors**

1. What type of antidiabetic medication do you take?

Oral medication [ ] Insulin injection [ ] Both [ ]

1. Have you ever experienced any side effect of anti-diabetic treatment? Yes [ ] No [ ]
2. Do you have health insurance that covers for your anti-diabetic medications cost?

Yes [ ] No [ ]

1. Do you find the cost of your anti-diabetic medication a challenge for you to meet due to financial constraint? Yes [ ] No [ ]
2. Have you ever received health education during your routine clinic visit to help you take your medication right? No [ ] Yes [ ]
3. Do you always find your prescribed medication available at the hospital pharmacy every time you go for your appointment visit? Yes [ ] No [ ]
4. Do the health workers follow up with you on how you should take your drug when at home?

No [ ] Yes [ ]

1. Do you think the health care workers are good to you and they treat you well?

No [ ] Yes [ ]

1. What is your blood glucose level? .................................

**Section D: Adherence to anti-diabetic medications**

|  | Items to assess | None of the times (4) | Sometimes  ( 3) | Most of the times (2) | All the times (1) |
| --- | --- | --- | --- | --- | --- |
| 1 | How often do you forget to take your medicine? |  |  |  |  |
| 2 | How often do you decide not to take your medicine? |  |  |  |  |
| 3 | How often do you miss taking your medicines because you feel better? |  |  |  |  |
| 4 | How often do you decide to take less of your medicine? |  |  |  |  |
| 5 | How often do you stop taking your medicines because you feel sick due to effects of the medicine? |  |  |  |  |
| 6 | How often do you forget to bring along your medicine when you travel away from home? |  |  |  |  |
| 7 | How often do you not take your medicine because you run out of it at home? |  |  |  |  |
| 8. | Overall score |  | | | |

**Supplementary 2: In-Depth Interview Guide**

**Title of the Study:** **Adherence to Anti-Diabetic Medication, Its Associated Factors, Barriers, Facilitators, and Strategies for Improvements among Adults with Type 2 Diabetes Mellitus Attending a Regional Referral Facility in Eastern Uganda: A Mixed Study Design**

**Introduction to the Participant**

Thank you for agreeing to participate in this interview. We are conducting a study to explore adherence to anti-diabetic medication, the factors that influence it, as well as barriers, facilitators, and strategies to improve adherence among adults with Type 2 Diabetes Mellitus attending this health facility. Your views and experiences are very important and will contribute to a better understanding of how to support people living with diabetes. All information you provide will be treated with strict confidentiality and used only for research purposes. You are free to decline to answer any question or withdraw from the interview at any time without any consequences.

**1. Background Information**

To begin, I would like to know a little more about you. Could you please tell me about yourself in terms of the following characteristics:

1. Your age
2. Your sex
3. Your marital status
4. Your level of education
5. The type of anti-diabetic medication you use (injectable or oral)
6. Your place of residence (rural or urban)

**2. Barriers to Adherence to Anti-Diabetic Medication**

1. Could you tell me about the challenges or barriers that make it difficult for you to take your anti-diabetic medication as prescribed?
2. (Probe if necessary: e.g., cost, side effects, forgetfulness, access to drugs, family support, beliefs, or workload)

**3. Facilitators of Adherence to Anti-Diabetic Medication**

1. What factors or circumstances help you to take your medication as prescribed?
2. (Probe if necessary: e.g., family support, reminders, regular follow-up, counseling, access to medicine, or motivation from healthcare providers)

**4. Strategies to Promote Adherence**

1. In your opinion, what strategies could be put in place to improve adherence to anti-diabetic medication among people with diabetes?
2. (Probe: what can health workers, the government, the community, or patients themselves do?)

**5. Closing Remarks**

Thank you very much for taking the time to share your views and experiences. Your insights are invaluable and will help in developing recommendations to improve adherence to anti-diabetic medication among people living with diabetes in Uganda.

Do you have any questions or additional comments you would like to share before we end the interview?
